# Supplementary material
Source: PubMed Central journal article supplement (PMC4261835)

Supplemental Figure 1. Correlations between  $P1'$  and  $fec-V1$  in the 96 2<sup>nd</sup> chromosome males. Within each female genetic background, positive correlations are observed between the proportion of offspring sired by the first male to mate ( $P1'$ ) and the number of offspring produced by the female immediately after mating to that male ( $fec-V1$ ), as shown by the solid black, red and blue regression lines. Across all females, however, there is a significant negative correlation between the proportion of offspring sired ( $P1'$ ) and male induced fecundity ( $fec-V1$ ) shown by the dashed purple regression line.

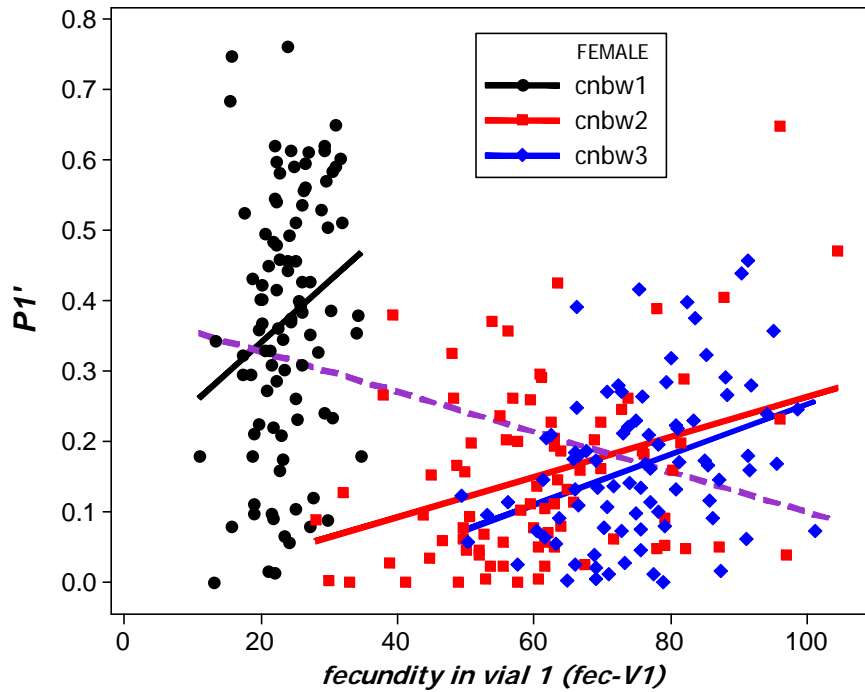

Supplement: supp_esu076_Reinhart_SupMat_Figure1_revised.pdf [file supp_esu076_Reinhart_SupMat_Figure1_revised.pdf]
